# Supplementary material for: SARS-CoV-2 infection and replication in human gastric organoids
Source: PubMed Central journal article supplement (PMC8595698; doi:10.1038/s41467-021-26762-2), 2021-11-16
Supplement: 41467_2021_26762_MOESM3_ESM.pdf [file 41467_2021_26762_MOESM3_ESM.pdf]

## **Description of Additional Supplementary Files**

### File Name: Supplementary Data 1

Description: List of significantly differentially expressed genes progressively down-/up-regulated in samples derived from donors of increasing fetal and pediatric age, with similar trend in tissues and organoids. Only genes with up-up or down-down trend were included. Expression is reported as CPM.

### File Name: Supplementary Data 2

Description: Full results of clusters enrichment analysis shown in Fig. 3f.

### File Name: Supplementary Data 3

Description: Results from a Quantitative Set Analysis for Gene Expression (QuSAGE) within the Gene Ontology database for data shown in Fig. 5. Paired comparisons between non-infected and infected samples were performed at each developmental stage.
